# Supplementary material
Source: PubMed Central journal article supplement (PMC4369785)
Supplement: NIHMS669821-supplement-2.pdf [file NIHMS669821-supplement-2.pdf]

| Supplemental Table                 |                                 | n     | univariate | multivariate |            |       |
|------------------------------------|---------------------------------|-------|------------|--------------|------------|-------|
|                                    |                                 |       | P          | OR           | 95% CI     | P     |
| <b>perceived higher risk</b>       | older age                       | 4036  | <.001      | 0.947        | .93-.96    | <.001 |
|                                    | male sex                        | 3383  | .28        | 2.418        | 1.27-4.60  | .007  |
|                                    | higher education                | 4029  | .46        | 1.026        | .97-1.09   | .38   |
|                                    | white non-Hispanic              | 1439  | .97        | 0.541        | .26-1.15   | .11   |
|                                    | caregiver ever                  | 4027  | <.001      | 1.241        | .51-1.29   | .37   |
|                                    | first degree relative with AD   | 3952  | <.001      | 12.759       | 7.28-22.36 | <.001 |
|                                    | number of relatives with AD     | 3940  | <.001      | 4.893        | 3.59-6.67  | <.001 |
|                                    | residence different from raised | 3907  | .03        | 1.18         | .75-1.85   | .47   |
| <b>greatest fear is AD</b>         | older age                       | 3940  | .02        | 1.002        | .99-1.01   | .67   |
|                                    | male sex                        | 3940  | .98        | 1.118        | .77-1.63   | .56   |
|                                    | higher education                | 3936  | .05        | 0.983        | .95-1.02   | .35   |
|                                    | white non-Hispanic              | 1819  | .19        | 1.225        | .77-1.95   | .39   |
|                                    | caregiver ever                  | 3931  | <.001      | 1.07         | .79-1.44   | .66   |
|                                    | first degree relative with AD   | 3863  | <.001      | 0.284        | 2.46-5.05  | <.001 |
|                                    | number of relatives with AD     | 3852  | <.001      | 0.731        | 1.20-1.57  | <.001 |
|                                    | residence different from raised | 3821  | .009       | 0.707        | 1.05-1.90  | .02   |
| <b>APOE testing is important</b>   | older age                       | 4036  | .06        | 0.992        | .98-1.002  | .12   |
|                                    | male sex                        | 3939  | <.001      | 1.711        | 1.25-2.34  | .0008 |
|                                    | higher education                | 4029  | <.001      | 0.957        | .93-.99    | .004  |
|                                    | white non-Hispanic              | 1811  | .07        | 1.348        | .89-2.03   | .15   |
|                                    | caregiver ever                  | 3929  | <.001      | 0.87         | .69-1.10   | .25   |
|                                    | first degree relative with AD   | 3922  | <.001      | 1.43         | 1.09-1.88  | <.001 |
|                                    | number of relatives with AD     | 3940  | <.001      | 1.145        | 1.05-1.25  | .002  |
|                                    | residence different from raised | 3819  | .24        | 0.967        | .77-1.21   | .77   |
| <b>Want APOE testing if free</b>   | older age                       | 4036  | .01        | 1.008        | 1.00-1.01  | .16   |
|                                    | male sex                        | 3951  | <.001      | 1.792        | 1.23-2.61  | .003  |
|                                    | higher education                | 4029  | <.001      | 0.927        | .90-.96    | <.001 |
|                                    | white non-Hispanic              | 1820  | .38        | 1.246        | .78-2.00   | .36   |
|                                    | caregiver ever                  | 3941  | .81        | 1.12         | .85-1.46   | .43   |
|                                    | first degree relative with AD   | 3933  | .47        | 0.847        | 0.62-1.17  | .31   |
|                                    | number of relatives with AD     | 3940  | .13        | 1.108        | 1.01-1.22  | .04   |
|                                    | residence different from raised | 3828  | .74        | 1.139        | .87-1.49   | .34   |
| <b>Will pay &gt;\$100 for APOE</b> | older age                       | 3851  | .68        | 0.993        | .99-1.002  | .14   |
|                                    | male sex                        | 3851  | <.001      | 1.63         | 1.23-2.16  | <.001 |
|                                    | higher education                | 3916  | .85        | 0.988        | .96-1.01   | .35   |
|                                    | white non-Hispanic              | 1773  | .09        | 1.296        | .89-1.88   | .17   |
|                                    | caregiver ever                  | 3841  | <.001      | 0.95         | .77-1.18   | .65   |
|                                    | first degree relative with AD   | 3936  | <.001      | 1.494        | 1.16-1.93  | .002  |
|                                    | number of relatives with AD     | 3940  | <.001      | 1.106        | 1.03-1.19  | .009  |
|                                    | residence different from raised | 3728  | .10        | 1.166        | .94-1.44   | .16   |
| <b>Research result-want</b>        | older age                       | 4036  | .01        | 1.013        | 1.00-1.03  | .10   |
|                                    | male sex                        | 3902  | <.001      | 1.905        | 1.13-3.22  | .02   |
|                                    | higher education                | 4029  | <.001      | 0.927        | .89-.97    | .001  |
|                                    | white non-Hispanic              | 1797  | .46        | 1.223        | .66-2.28   | .53   |
|                                    | caregiver ever                  | 3892  | .15        | 0.98         | .68-1.39   | .90   |
|                                    | first degree relative with AD   | 3885  | .42        | 0.69         | .45-1.06   | .09   |
|                                    | number of relatives with AD     | 3940  | .08        | 1.081        | .95-1.23   | .27   |
|                                    | residence different from raised | 0.781 | .73        | 1.221        | .86-1.74   | .27   |
| <b>Biomarker test-want</b>         | older age                       | 4036  | .94        | 0.992        | .98-1.003  | .18   |
|                                    | male sex                        | 3869  | <.001      | 1.967        | 1.33-2.92  | <.001 |
|                                    | higher education                | 4029  | .002       | 0.965        | .93-1.00   | .04   |
|                                    | white non-Hispanic              | 1773  | .63        | 1.029        | .65-1.63   | .90   |
|                                    | caregiver ever                  | 3859  | <.001      | 0.85         | .65-1.12   | .25   |
|                                    | first degree relative with AD   | 3852  | <.001      | 1.217        | .88-1.68   | .23   |
|                                    | number of relatives with AD     | 3940  | <.001      | 1.184        | 1.07-1.32  | .002  |
|                                    | residence different from raised | 3752  | .49        | 1.169        | .89-1.53   | .26   |

|                                   |                                 |      |       |       |            |       |
|-----------------------------------|---------------------------------|------|-------|-------|------------|-------|
| <b>APOE test question correct</b> | older age                       | 4036 | .002  | 1.015 | 1.002-1.03 | .02   |
|                                   | male sex                        | 3812 | .09   | 0.89  | .61-1.30   | .55   |
|                                   | higher education                | 4029 | <.001 | 0.95  | .92-.98    | .004  |
|                                   | white non-Hispanic              | 1747 | .04   | 1.051 | 1.06-2.57  | .03   |
|                                   | caregiver ever                  | 3802 | .10   | 0.85  | .63-1.15   | .29   |
|                                   | first degree relative with AD   | 3790 | .86   | 0.808 | .57-1.15   | .24   |
|                                   | number of relatives with AD     | 3940 | .14   | 1.004 | .91-1.11   | .94   |
|                                   | residence different from raised | 3694 | .86   | 1.174 | .88-1.57   | .28   |
| <b>Suicide-genetic high risk</b>  | older age                       | 3706 | <.001 | 1.02  | 1.01-1.04  | .008  |
|                                   | male sex                        | 3706 | .88   | 1.124 | .75-1.69   | .57   |
|                                   | higher education                | 4029 | .007  | 1.02  | .98-1.07   | .37   |
|                                   | white non-Hispanic              | 1721 | .10   | 0.522 | .25-1.09   | .08   |
|                                   | caregiver ever                  | 3696 | .32   | 1.002 | .71-1.42   | .99   |
|                                   | first degree relative with AD   | 3690 | .08   | 1.099 | .73-1.66   | .65   |
|                                   | number of relatives with AD     | 3940 | .55   | 0.994 | .72-1.41   | .92   |
|                                   | residence different from raised | 3588 | .61   | 1.006 | .72-1.41   | .97   |
| <b>Suicide-biomarker positive</b> | older age                       | 3639 | .07   | 1.001 | .99-1.02   | .85   |
|                                   | male sex                        | 3639 | .54   | 1.155 | .75-1.79   | .52   |
|                                   | higher education                | 4029 | <.001 | 1.055 | 1.01-1.11  | .03   |
|                                   | white non-Hispanic              | 1684 | .42   | 0.669 | .33-1.35   | .26   |
|                                   | caregiver ever                  | 3629 | .61   | 0.93  | .64-1.35   | .70   |
|                                   | first degree relative with AD   | 3621 | .38   | 1.15  | .74-1.79   | .54   |
|                                   | number of relatives with AD     | 3940 | .61   | 0.95  | .84-1.08   | .43   |
|                                   | residence different from raised | 3525 | .62   | 1.03  | .72-1.48   | .87   |
| <b>Tell friends APOE result</b>   | older age                       | 3376 | .003  | 0.991 | .98-1.00   | .05   |
|                                   | male sex                        | 3376 | <.001 | 0.658 | .50-.86    | .002  |
|                                   | higher education                | 4029 | .009  | 0.978 | .95-1.01   | .12   |
|                                   | white non-Hispanic              | 1557 | .30   | 0.693 | .48-1.01   | .05   |
|                                   | caregiver ever                  | 3367 | <.001 | 0.90  | .72-1.13   | .36   |
|                                   | first degree relative with AD   | 3362 | .06   | 0.893 | .69-1.16   | .40   |
|                                   | number of relatives with AD     | 3940 | <.001 | 1.041 | .96-1.12   | .31   |
|                                   | residence different from raised | 3277 | <.001 | 1.081 | .82-1.27   | .87   |
| <b>Tell family APOE result</b>    | older age                       | 4036 | .004  | 1.025 | 1.003-1.05 | .02   |
|                                   | male sex                        | 4037 | .51   | 0.967 | .53-1.78   | .91   |
|                                   | higher education                | 4029 | .87   | 1.025 | .96-1.09   | .44   |
|                                   | white non-Hispanic              | 1863 | .81   | 1.189 | .53-2.67   | .68   |
|                                   | caregiver ever                  | 4027 | .02   | 0.72  | .44-1.18   | .19   |
|                                   | first degree relative with AD   | 3952 | .38   | 0.708 | .39-1.28   | .26   |
|                                   | number of relatives with AD     | 3940 | .001  | 0.794 | 1.02-1.56  | .04   |
|                                   | residence different from raised | 3907 | .47   | 1.051 | .65-1.70   | .84   |
| <b>Lead healthier lifestyle</b>   | older age                       | 4036 | .002  | 0.984 | .97-1.00   | .05   |
|                                   | male sex                        | 3841 | .36   | 1.101 | .68-1.78   | .70   |
|                                   | higher education                | 4029 | .002  | 0.911 | .87-.96    | <.001 |
|                                   | white non-Hispanic              | 1772 | .26   | 1.374 | .65-2.89   | .40   |
|                                   | caregiver ever                  | 3832 | .04   | 0.83  | .56-1.23   | .35   |
|                                   | first degree relative with AD   | 3823 | .48   | 1.094 | .69-1.74   | .70   |
|                                   | number of relatives with AD     | 3940 | .10   | 1.093 | .95-1.26   | .23   |
|                                   | residence different from raised | 3721 | .87   | 0.974 | .67-1.42   | .89   |
| <b>Longterm care insurance</b>    | older age                       | 4036 | <.001 | 0.948 | .94-.96    | <.001 |
|                                   | male sex                        | 3693 | <.001 | 0.733 | .55-.99    | .04   |
|                                   | higher education                | 4029 | .33   | 1.003 | .97-1.04   | .83   |
|                                   | white non-Hispanic              | 1709 | .12   | 1.148 | .73-1.80   | .55   |
|                                   | caregiver ever                  | 3684 | .10   | 1.13  | .87-1.45   | .37   |
|                                   | first degree relative with AD   | 3677 | .004  | 1.142 | .84-1.55   | .40   |
|                                   | number of relatives with AD     | 3952 | .004  | 0.996 | .91-1.09   | .93   |
|                                   | residence different from raised | 3576 | .06   | 0.992 | .77-1.27   | .95   |

|                                    |                                 |      |       |       |           |       |
|------------------------------------|---------------------------------|------|-------|-------|-----------|-------|
| <b>Spend all money</b>             | older age                       | 4036 | .01   | 0.999 | .99-1.01  | .82   |
|                                    | male sex                        | 3656 | .007  | 0.78  | .54-1.12  | .18   |
|                                    | higher education                | 4029 | .38   | 1.008 | .98-1.04  | .66   |
|                                    | white non-Hispanic              | 1692 | <.001 | 2.132 | .32-.69   | <.001 |
|                                    | caregiver ever                  | 3646 | .10   | 0.83  | .63-1.10  | .19   |
|                                    | first degree relative with AD   | 3638 | .48   | 0.942 | .68-1.31  | .72   |
|                                    | number of relatives with AD     | 3840 | .49   | 0.988 | .90-1.09  | .81   |
|                                    | residence different from raised | 3543 | .24   | 1.019 | .78-1.34  | .89   |
|                                    |                                 |      |       |       |           |       |
| <b>Biomarker question means AD</b> | older age                       | 4036 | .05   | 0.99  | .98-1.002 | .10   |
|                                    | male sex                        | 3835 | .95   | 0.957 | .68-1.35  | .80   |
|                                    | higher education                | 4029 | .50   | 0.998 | .96-1.03  | .92   |
|                                    | white non-Hispanic              | 1761 | .10   | 0.707 | .46-1.09  | .12   |
|                                    | caregiver ever                  | 3825 | .19   | 1.02  | .77-1.36  | .87   |
|                                    | first degree relative with AD   | 3813 | .23   | 1.008 | .72-1.41  | .96   |
|                                    | number of relatives with AD     | 3835 | .31   | 1.006 | .91-1.11  | .90   |
|                                    | residence different from raised | 3718 | .98   | 1.055 | .80-1.40  | .71   |
|                                    |                                 |      |       |       |           |       |
| <b>Tell someone APOE result</b>    | older age                       | 4036 | .51   | 0.998 | .96-1.04  | .92   |
|                                    | male sex                        | 3975 | .88   | 0.843 | .24-2.98  | .79   |
|                                    | higher education                | 4029 | .58   | 1.099 | .97-1.24  | .14   |
|                                    | white non-Hispanic              | 1832 | .76   | 1.927 | .54-6.87  | .31   |
|                                    | caregiver ever                  | 3965 | .99   | 0.82  | .31-2.19  | .70   |
|                                    | first degree relative with AD   | 3945 | .25   | 0.793 | .24-2.64  | .70   |
|                                    | number of relatives with AD     | 3940 | .04   | 0.703 | .44-1.13  | .14   |
|                                    | residence different from raised | 3849 | .13   | 1.101 | .43-2.81  | .84   |
